# Supplementary material for: Characteristics, consequences and prevention of falls in institutionalised older adults in the province of Malaga (Spain): a prospective, cohort, multicentre study
Source: PubMed Central journal article supplement — BMJ Open. 2018 Feb 23;8(2):e020039. doi: 10.1136/bmjopen-2017-020039 (PMC5855255; doi:10.1136/bmjopen-2017-020039), 2018-02-23
Supplement: bmjopen-2017-020039.draft_revisions.pdf [file bmjopen-2017-020039.draft_revisions.pdf]

# BMJ Open

BMJ Open is committed to open peer review. As part of this commitment we make the peer review history of every article we publish publicly available.

When an article is published we post the peer reviewers' comments and the authors' responses online. We also post the versions of the paper that were used during peer review. These are the versions that the peer review comments apply to.

The versions of the paper that follow are the versions that were submitted during the peer review process. They are not the versions of record or the final published versions. They should not be cited or distributed as the published version of this manuscript.

BMJ Open is an open access journal and the full, final, typeset and author-corrected version of record of the manuscript is available on our site with no access controls, subscription charges or pay-per-view fees (<http://bmjopen.bmj.com>).

If you have any questions on BMJ Open's open peer review process please email [info.bmjopen@bmj.com](mailto:info.bmjopen@bmj.com)

# BMJ Open

## Falls by institutionalised older adults: characteristics, consequences and prevention. A prospective multicentre study.

|                                 |                                                                                                                                                                                                                                                                                                                                                                                                                                                                                                                                                                                                                                                                                                                                            |
|---------------------------------|--------------------------------------------------------------------------------------------------------------------------------------------------------------------------------------------------------------------------------------------------------------------------------------------------------------------------------------------------------------------------------------------------------------------------------------------------------------------------------------------------------------------------------------------------------------------------------------------------------------------------------------------------------------------------------------------------------------------------------------------|
| Journal:                        | <i>BMJ Open</i>                                                                                                                                                                                                                                                                                                                                                                                                                                                                                                                                                                                                                                                                                                                            |
| Manuscript ID                   | bmjopen-2017-020039                                                                                                                                                                                                                                                                                                                                                                                                                                                                                                                                                                                                                                                                                                                        |
| Article Type:                   | Research                                                                                                                                                                                                                                                                                                                                                                                                                                                                                                                                                                                                                                                                                                                                   |
| Date Submitted by the Author:   | 16-Oct-2017                                                                                                                                                                                                                                                                                                                                                                                                                                                                                                                                                                                                                                                                                                                                |
| Complete List of Authors:       | Aranda-Gallardo, Marta; Agencia Sanitaria Costa del Sol, Department of Nursing<br>Miguel Morales-Asencio, Jose; Universidad de Málaga. Facultad de Ciencias de la Salud, Department of Nursing<br>Enriquez de Luna-Rodriguez, Margarita; Agencia Sanitaria Costa del Sol, Department of Nursing<br>Vazquez-Blanco, Maria Jose; Distrito Sanitario Málaga-Guadalhorce, Nursing Homes Unit<br>Morilla-Herrera, Juan Carlos; Distrito Sanitario Málaga-Guadalhorce, Nursing Homes Unit<br>Rivas-Ruiz, Francisco; Agencia Sanitaria Costa del Sol, Research Unit<br>Toribio-Montero, Juan Carlos; Agencia Sanitaria Costa del Sol, Department of Nursing<br>Canca-Sanchez, Jose Carlos; Agencia Sanitaria Costa del Sol, Department of Nursing |
| <b>Primary Subject Heading</b>: | Nursing                                                                                                                                                                                                                                                                                                                                                                                                                                                                                                                                                                                                                                                                                                                                    |
| Secondary Subject Heading:      | Health services research, Geriatric medicine                                                                                                                                                                                                                                                                                                                                                                                                                                                                                                                                                                                                                                                                                               |
| Keywords:                       | accidental fall, physical restraint, accident prevention, nursing homes                                                                                                                                                                                                                                                                                                                                                                                                                                                                                                                                                                                                                                                                    |
|                                 |                                                                                                                                                                                                                                                                                                                                                                                                                                                                                                                                                                                                                                                                                                                                            |

SCHOLARONE™  
Manuscripts

1  
2  
3 **FALLS BY INSTITUTIONALISED OLDER ADULTS: CHARACTERISTICS,**  
4 **CONSEQUENCES AND PREVENTION. A PROSPECTIVE MULTICENTRE**  
5 **STUDY.**  
6  
7  
8

9  
10 **Authors:**

11  
12 Marta Aranda-Gallardo<sup>1</sup>, Jose M Morales-Asencio<sup>2</sup>, Margarita Enriquez de Luna-  
13 Rodriguez<sup>1</sup>, Maria J Vazquez-Blanco<sup>3</sup>, Juan C Morilla-Herrera<sup>3</sup>, Francisco Rivas-Ruiz<sup>4</sup>,  
14  
15 Juan C Toribio Montero<sup>1</sup>, Jose C Canca-Sanchez<sup>1</sup>.  
16  
17

18  
19 <sup>1</sup>Department of Nursing. Agencia Sanitaria Costa del Sol, Marbella, Malaga, Spain.  
20

21  
22 <sup>2</sup>Faculty of Health Sciences, University of Malaga, Malaga, Spain.  
23

24  
25 <sup>3</sup>Nursing Homes Unit. Distrito Sanitario Malaga-Guadalhorce, Malaga, Spain.  
26

27  
28 <sup>4</sup>Research Unit. Agencia Sanitaria Costa del Sol, Marbella, Malaga, Spain.  
29  
30

31  
32 **Address correspondence to:** M. Aranda-Gallardo. Department of Nursing, Agencia  
33 Sanitaria Costa del Sol, Autovia A7 km. 187, 29603 Marbella, Malaga, Spain. Tel:  
34  
35 (+34) 951 976 612. Fax: 952 863 460. E-mail: [maranda@hcs.es](mailto:maranda@hcs.es)  
36  
37  
38  
39  
40  
41

42 **Key words:** Accidental fall, accident prevention, nursing homes, physical restraint.  
43

44 **Word Count:** 3072.  
45  
46  
47  
48  
49  
50  
51  
52  
53  
54  
55  
56  
57  
58  
59  
60

## Abstract

**Objectives:** Falls are an important adverse event among institutionalised persons. It is in this clinical setting where falls occur more frequently than in any other, despite the measures commonly taken to prevent them. This study aimed to determine the profile of a typical institutionalised elderly patient who suffers a fall, and to describe the potential consequences. We then examined the association between falls and the preventive measures used.

**Methods:** This was a prospective cohort study in 37 nursing homes in Spain. The participants were all the nursing home residents institutionalised in these centres from May 2014 to July 2016. Participants were followed up for nine months. During this period, two observations were made to evaluate the preventive measures taken and to record the occurrence of falls.

**Results:** 896 residents were recruited, of whom 647 completed the study. During this period, 411 falls took place, affecting 213 residents. The injuries caused by the falls were mostly minor or moderate. They took place more frequently among women, and provoked 22 fractures (5.35%). The most commonly-used fall prevention measure were bed rails (53.53% of cases), followed by physical restraint (16.79%). The latter measure was associated with a higher incidence of injuries not requiring stitches (OR=2.06, 95% CI 1.01-4.22, p=0.054) and of injuries that did require stitches (OR=3.51, 95% CI 1.36-9.01, p=0.014) as a consequence of falls. Bed rails protected against night-time falls.

**Conclusions:** Falls are a very common adverse event in nursing homes. The prevention of falls is most commonly addressed by methods to restrain movement. The use of physical restraints is associated with a greater occurrence of injuries caused by a fall.

### Strengths and limitations of this study

- This study describes the type of people who falls in a large cohort in nursing home residents and the consequences of falls.
- The most commonly used fall prevention measures are presented and their relationship with incidence and fall injury is analyzed.
- The results of this study allow us to reflect on and question the suitability of fall prevention measures used in clinical practice in nursing homes.

## BACKGROUND

Worldwide, falls are the second cause of death from accidental or unintentional injuries, after road traffic injuries. Each year, falls provoke 424,000 deaths throughout the world, with the highest incidence in low- and middle-income countries<sup>1</sup>. According to the World Health Organization (WHO), older people living in care institutions are more liable to fall than those living in the community: every year 30-50% of persons who are long-term resident in institutions suffer a fall, and 40% of them have more than one fall<sup>2</sup>. 20-30% of elderly persons who fall suffer moderate to severe injuries, such as hip fractures or traumatic brain injury. These lesions reduce mobility and independence, and increase the risk of premature death. In nursing homes and among women aged over 75 years, injury rates may be more than double the above figures<sup>3</sup>. In addition to the physical and emotional costs provoked by falls, the economic consequences are significant, with direct costs estimated at about €19.2 billion dollars per year<sup>4</sup>.

The aetiology of falls has been the subject of various epidemiological studies. A systematic review found that for residents of nursing homes, the following factors were directly related: a history of falls (OR=3.06), using a walking aid (OR=2.08) and moderate disability (OR=2.08)<sup>5</sup>. Efforts to minimise falls in nursing homes, where advanced age and physical, mental and sensorial limitations are commonly present, often consist of multifactor interventions. To design effective preventive measures, it is necessary to determine the circumstances associated with falls, and the injuries they can provoke, to categorize which circumstances involve the most severe negative outcomes.

### Purpose

The aim of this study was to determine the profile of institutionalised elderly persons who suffer falls, their circumstances and the consequences of this event. We also aimed

1  
2  
3 to know what methods were adopted to prevent falls and then to analyse the association  
4  
5 between falls and the preventive measures employed.  
6  
7  
8  
9

## 10 **METHODS**

11  
12  
13 **Study Design:** Prospective cohort study.  
14

15 **Participants:** The study was carried out in institutions within the Nursing Homes Unit  
16 of the Málaga-Guadalhorce Health District, in Andalusia, southern Spain. This Unit  
17 cares for 2,541 persons resident in 68 nursing homes. The study participants were  
18 mostly elderly and institutionalised in these centres. The inclusion criteria applied were  
19 that they should be older than 16 years and resident in one of the above nursing homes  
20 throughout the study period, or have entered during the study period. Those who refused  
21 to participate were excluded.  
22  
23  
24  
25  
26  
27  
28  
29

30  
31 **Sample:** The necessary sample size was calculated according to the prevalence of falls  
32 reported in previous studies conducted in nursing homes. To detect a fall prevalence of  
33 52%<sup>6</sup>, with an alpha value of 0.05 in a population of 2,541 institutionalised subjects and  
34 a precision of 4%, it was determined that 485 subjects should be recruited. This value  
35 was increased by 50% in anticipation of high mortality rates among the elderly  
36 population, and so the minimum sample required for the initial evaluation was 728  
37 residents.  
38  
39  
40  
41  
42  
43  
44  
45

46 **Data collection:** The study was conducted from May 2014 to July 2016. The  
47 participants were recruited consecutively at each collaborating centre, and all of the  
48 residents at these 37 centres agreed to take part.  
49  
50  
51

52  
53 The data evaluated included the patients' age and sex, the fall prevention measures  
54 employed (bed rails, physical restraints, the rearrangement of furniture and the  
55  
56  
57  
58  
59  
60

1  
2  
3 suspension of psychotropic medication), the number of falls suffered, the level of  
4  
5 consciousness when the fall occurred, the date and time of day, the circumstances  
6  
7 (alone, walking, going to toilet) and consequences of each fall. In an initial assessment,  
8  
9 the characterisation variables were collected and the fall prevention measures  
10  
11 investigated. The same patients were reassessed six months later, after which they were  
12  
13 followed for three more months to detect the occurrence of any additional falls in this  
14  
15 period.  
16

17  
18 Falls were evaluated in three ways: by analysing the records maintained by each nursing  
19  
20 home, verifying them with the caregiver staff and also with the patients themselves if  
21  
22 their cognitive state allowed it. The definition adopted for a fall was that proposed by  
23  
24 the WHO: “an event which results in a person coming to rest inadvertently on the  
25  
26 ground or floor or other lower level”<sup>1</sup>. In all cases of falls the nurses who collaborated  
27  
28 with the project filled in a record form, stating the circumstances and consequences of  
29  
30 each fall.  
31

32  
33  
34 **Statistical analysis:** Descriptive statistics of the variables were obtained by an  
35  
36 exploratory analysis, which obtained measures of central tendency and dispersion or  
37  
38 percentages, according to the nature of the variables. The normality of the distribution  
39  
40 was evaluated in each case by the Kolmogorov-Smirnov test. Asymmetry and/or  
41  
42 kurtosis were also considered, and histograms of the distributions were obtained.  
43

44  
45 Bivariate analysis was performed using Student’s t and chi-square tests, according to the  
46  
47 characteristics of the variables, when they were normally distributed. Otherwise,  
48  
49 nonparametric methods, such as the Wilcoxon, Kruskal-Wallis or Mann-Whitney U  
50  
51 tests were used. The descriptors obtained were the joint and marginal distributions, with  
52  
53 the mean, standard deviation (SD), measures of effect and 95% confidence intervals  
54  
55  
56  
57  
58  
59  
60



(CI). Correlational analyses between quantitative variables were performed using Pearson's or Spearman's  $r$ , depending on the nature of the parameter.

The statistical program used was SPSS v.22.

**Ethical considerations:** The clinical data were segregated from the identification data, and the databases were encrypted and stored in computers destined exclusively to this project. The data were collected online (Lime Survey), encrypted, and hosted on a server with maximum security measures and password-coded access. Ethical approval for this study was obtained from the Costa del Sol Research Ethics Committee (reference CS-0519).

## RESULTS

The study sample consisted of 896 nursing home residents. All received an initial assessment, and 688 (76.78%) were followed up and re-evaluated at six months. Finally, 647 patients completed the study after nine months of follow-up (Fig. 1). Of the initial patients, 636 (71%) were women and 260 (29%) were men. The mean age was 81.81 years (SD 9.73) in a range between 36 and 102 years. The mean age of the women (83.89 years, SD 8.93) was significantly higher than that of the men (77.95 years, SD 10.51) ( $p < 0.001$ ).

During the study period, 213 residents (23.77%, 95% CI: 20.93-26.15) suffered a fall, and 88 had multiple falls. In total, there were 411 falls. The cumulative incidence of falls was 45.87%. Of those who fell, 155 (72.77%) were women, although there were no significant differences by sex between fallers and non-fallers ( $p = 0.546$ ) or between fallers and multiple-fallers ( $p = 0.518$ ). The mean age of the fallers (83.45 years; SD 8.06) was significantly higher than that of the non-fallers (81.31 years; SD 10.14)

1  
2  
3 (p=0.015). However, there were no significant differences by sex between those who  
4  
5 suffered multiple falls (mean age 83.46 years, SD 8.34) and those who did not (mean  
6  
7 age 83.51 years, SD 7.72) (p=0.907). The circumstances and consequences of the falls  
8  
9 that occurred are shown in Table 1. By days of the week, the largest number of falls  
10  
11 took place on a Sunday (17.52%), and they were evenly distributed among the morning,  
12  
13 afternoon and evening shifts. The patients who suffered falls were mainly conscious and  
14  
15 well-oriented (n=303, 73.72%). In 242 cases (58.88%), the patient was alone at the time  
16  
17 of the fall, and on most occasions (n= 305, 74.21%) the fall did not take place while the  
18  
19 patient was walking. In 43 cases (10.46%), the fall occurred when the resident was  
20  
21 going towards the toilet.  
22  
23

24  
25 As shown in Table 1, in 168 cases (40.88%) the fall provoked a consequence for the  
26  
27 resident, the most frequent being haematomas (n=87) and injuries not requiring stitches  
28  
29 (n=60). There were 22 fractures (5.35%). The bivariate analysis revealed significant  
30  
31 differences by sex concerning the day of the fall, with Sundays being more frequent  
32  
33 among women (20.2%) and Mondays among men (22.8% of the falls affecting men  
34  
35 occurred on this day of the week) (p=0.045). Women were more likely to fall in the  
36  
37 morning (40.4%), and men at night (41.2%) (p=0.001). Men tended to fall from bed  
38  
39 (40.4%) and women from a chair (27.1%) (p=0.001). There were significantly more  
40  
41 falls among men when they were alone (73.7%, p<0.001) and among women while they  
42  
43 were walking (30%, p=0.002). Regarding the consequences, women were significantly  
44  
45 more affected by falls than were men (44.4% vs. 31.58% respectively, p=0.019). By the  
46  
47 type of consequence, fractures affected women more than men (n=20 vs. n=2) but the  
48  
49 difference was at the limit of statistical significance (p=0.05).  
50  
51

52  
53 Concerning the preventive measures used, of the 1,584 assessments made, bed rails  
54  
55 were employed in 53.53% of cases; in 16.79% there were physical restraints and in  
56  
57  
58  
59

1  
2  
3 3.03%, the suspension of psychotropic medication. In no case was the clinical furniture  
4 rearranged. When falls took place, in 45.25% of the cases bed rails were fitted, in  
5 12.16% there were physical restraints and in 6.57% the psychotropic medication had  
6 been suspended (Table 1). An analysis was performed to determine whether any of the  
7 prevention measures adopted were related to injuries due to falls. In this respect, no  
8 significant relationship was observed between fall-related injuries and the use of bed  
9 rails or the suspension of psychotropic medication. However, the use of physical  
10 restraints was found to be significantly associated with such consequences, in 28 of the  
11 50 falls with restraints ( $p=0.022$ ). Specifically, the use of restraints was associated with  
12 a higher incidence of injuries not requiring stitches in 12 cases (OR=2.06, 95% CI 1.01-  
13 4.22), although the difference was at the limit of statistical significance ( $p=0.054$ ). In  
14 seven cases, stitches were needed for injuries suffered when restraints were fitted  
15 (OR=3.51, 95% CI 1.36-9.01,  $p=0.014$ ). None of the preventive measures examined  
16 were related to the occurrence of fractures following a fall. On the other hand, there was  
17 found to be a relation between the use of preventive measures and the following  
18 variables: the time of day, the place and the circumstances of the fall. When bed rails  
19 were used during the night, they had a protective effect, which is quite significant, as 37  
20 of the 123 falls occurred during the night ( $p<0.001$ ).  
21  
22  
23  
24  
25  
26  
27  
28  
29  
30  
31  
32  
33  
34  
35  
36  
37  
38  
39  
40  
41  
42  
43

## 44 **DISCUSSION**

45  
46  
47 Among the strengths of this study are the large sample size ( $n=896$ ), the extended  
48 follow-up period (nine months) and its multi-centre format, with the participation of 37  
49 nursing homes for the elderly. The sample consisted mainly of women (71%), who on  
50 average were almost six years older than the male participants, which is in line with the  
51 greater longevity of the female sex. The majority of those who suffered falls were  
52  
53  
54  
55  
56  
57  
58  
59  
60

1  
2  
3 women too, but there were no differences by sex in the occurrence of one or more falls,  
4 a finding that corroborates previous research in this respect in nursing homes<sup>7</sup>. The  
5 study subjects were elderly, with an average age of about 82 years. The results obtained  
6 confirm that advanced age is a risk factor for falls, with fallers being on average two  
7 years older than non-fallers.  
8

9  
10  
11  
12  
13  
14 The cumulative incidence of falls (45.87%) is within the range published in the  
15 literature in this context. In this respect, other authors have reported rates of 34-46% in  
16 our country<sup>8</sup>, and even 52% in other country<sup>6</sup>. In our study, over half of the falls that  
17 took place (59.12%) had no consequences on the patient, and when there were  
18 consequences, they usually took the form of minor injuries. Taking into account the  
19 minor injuries produced, whether or not stitches were required, and the falls resulting in  
20 fractures, our results showed a slightly lower incidence of fractures with regards to  
21 those previously reported. Rubenstein (2006) concluded that in nursing homes 10-25%  
22 of falls result in fractures or injuries<sup>9</sup>. Another study observed that “*serious falls were*  
23 *associated with increasing age, being female, and less restricted functional status*”<sup>10</sup>.  
24 Our results show that women suffer more consequences from falls than men;  
25 nevertheless, there were no differences by sex as concerns injuries requiring stitches or  
26 not, or when the fall provoked a fracture. Although such consequences were more  
27 evident among women, the difference was at the limit of statistical significance.  
28  
29  
30  
31  
32  
33  
34  
35  
36  
37  
38  
39  
40  
41  
42  
43

44 Although several research studies have shown that exercise programs are effective to  
45 prevent falls in long term care facilities<sup>11</sup>, the fall prevention strategies observed in our  
46 study are aimed at limiting mobility. The most commonly used fall prevention measure  
47 was that of bed rails, followed by physical restraints. In fall events, the presence of  
48 restraints was associated with a greater frequency of injuries, in particular those not  
49 requiring stitches (the difference was at the limit of significance) and those where  
50  
51  
52  
53  
54  
55  
56  
57  
58  
59  
60

1  
2  
3 stitches were required. Another preventive measure used was the suspension of  
4  
5 psychotropic medication. Clinical practice guidelines recommend, that older people on  
6  
7 psychotropic medications should have their medication reviewed, with specialist input if  
8  
9 appropriate, and discontinued if possible to reduce their risk of falling<sup>12</sup>. Nevertheless,  
10  
11 this measure was adopted in only 3.03% of the assessments made. The use of methods  
12  
13 of physical and pharmacological containment is a controversial topic, since it implies a  
14  
15 restriction of mobility, which is detrimental to the patient's functional capacity. A  
16  
17 systematic review found no evidence that bed rails increased the risk of falls or of  
18  
19 injuries from falls<sup>13</sup>, in contrast to our own findings. Moreover, when bed rails were  
20  
21 used during the night shift, fewer falls occurred. According to the Spanish Bioethics  
22  
23 Committee<sup>14</sup>, the use of restraints in nursing homes for the elderly is more common in  
24  
25 Spain than elsewhere, reaching almost 40%, compared to 15% in countries such as  
26  
27 France, Italy, Norway and the USA. The Spanish Bioethics Committee recommends  
28  
29 that the use of mobility restrictions should be protocolised, supervised and subject to  
30  
31 ongoing evaluation, and in all cases, should be performed with the consent of the  
32  
33 patients or their guardians. The results obtained in the present study corroborate these  
34  
35 recommendations, although the existence or otherwise of consent for the physical  
36  
37 restraints used was not verified. That could be the subject of future studies. Cognitive  
38  
39 impairment, severe mobility problems and a greatly restricted capacity to perform the  
40  
41 activities of daily living are determinant factors in the decision to implement systems of  
42  
43 restraint. With regard to fall prevention, the combination of these factors requires  
44  
45 special nursing care. Paradoxically, the use of these containment systems has been  
46  
47 associated with a higher incidence of falls<sup>15</sup>, although in fact their use for nursing home  
48  
49 residents is considered necessary by the staff who attends them. The prime reason for  
50  
51 their use is, precisely, to prevent falls, as reported in a survey of nursing staff in Spain<sup>16</sup>.  
52  
53  
54  
55  
56  
57  
58  
59  
60

1  
2  
3 The proper use of fall prevention measures could usefully be considered in a later study,  
4  
5 together with consideration of the moral dilemma that would be posed to nursing staff if  
6  
7 no measures of containment were applied to patients at risk. It would be advisable to  
8  
9 increase the periodicity of assessments to detect possible risk factors for recurrence and  
10  
11 thus avoid possible falls.  
12

13  
14 This study has some limitations. In particular, the number of fall events may have been  
15  
16 understated. To address this possibility, an event record table was created, distributed to  
17  
18 all the nursing homes participating and collected weekly. On the collection day, the  
19  
20 researchers directly considered the veracity of the data reported, at the corresponding  
21  
22 health centres. In addition, due to the nature of the study conducted, there could be  
23  
24 contamination related to the implementation of fall prevention interventions in the  
25  
26 nursing homes, and a possible Hawthorne effect.  
27

28  
29 In conclusion, this study shows that falls are a common adverse event in nursing homes.  
30  
31 They are related to advanced age, and provoke injuries that are mainly slight to  
32  
33 moderate. The method most commonly used to prevent falls is that of movement  
34  
35 restriction. The use of physical restraints is associated with a greater occurrence of  
36  
37 injuries due to falls.  
38  
39  
40  
41  
42

#### 43 **Author's contribution**

44  
45 JMMA and MAG designed the study. MAG, MELR, MJVB, JCCS, JCMH, FRR and  
46  
47 JCTM were involved in data collection and evaluation. JMMA performed the statistical  
48  
49 analysis. All authors helped with the interpretation of the data. MAG, MELR, MJVB  
50  
51 and JMMA drafted the first version of the manuscript, and all authors contributed to  
52  
53  
54  
55  
56  
57  
58  
59  
60

1  
2  
3 subsequent versions and revised it critically for important intellectual content. All  
4  
5 authors read and approved the final manuscript.  
6  
7  
8  
9

### 10 **Funding**

11  
12 This work was supported by the Regional Health Ministry of Andalusia [PI-0152/2013];  
13  
14 approval notification received December 2013.  
15  
16  
17  
18  
19

### 20 **Competing interest**

21  
22 The authors have no conflicts of interest to disclose.  
23  
24  
25  
26  
27

### 28 **Ethics approval**

29  
30 The Costa del Sol Research Ethics Committee granted its consent (reference CS-0519).  
31  
32  
33  
34  
35

### 36 **Data sharing statement**

37  
38 Data are available on request from the authors.  
39  
40  
41  
42  
43

### 44 **Acknowledgements**

45  
46 We thank the managers and collaborators of all nursing homes participating in the  
47  
48 project.  
49  
50  
51  
52  
53  
54  
55  
56  
57  
58  
59  
60

**REFERENCES**

1. World Health Organization. Falls. Fact sheet No. 344 [Internet]. 2016. Available at: <http://bit.ly/1i7Ixzq>
2. World Health Organization. WHO Global Report on Falls Prevention in Older Age [Internet]. 2007. Available at: <http://bit.ly/1IltXUR>
3. Gama ZA da S, Conesa AAG. Morbilidad, factores de riesgo y consecuencias de las caídas en ancianos. *Fisioterapia* 2008;30:142-51.
4. Stevens JA, Corso PS, Finkelstein EA, Miller TR. The costs of fatal and non-fatal falls among older adults. *Inj Prev* 2006;12:290-5.
5. Deandrea S, Bravi F, Turati F, *et al*. Risk factors for falls in older people in nursing homes and hospitals. A systematic review and meta-analysis. *Arch Gerontol Geriatr* 2013;56:407-15.
6. Meyer G, Köpke S, Haastert B, Mühlhauser I. Comparison of a fall risk assessment tool with nurses' judgement alone: a cluster-randomised controlled trial. *Age Ageing* 2009;38:417-23.
7. Sharifi F, Fakhrzadeh H, Memari A, *et al*. Predicting risk of the fall among aged adult residents of a nursing home. *Arch Gerontol Geriatr* 2015;61:124-30.
8. Silva Gama ZA da, Gómez Conesa A, Sobral Ferreira M. Epidemiología de caídas de ancianos en España: Una revisión sistemática, 2007. *Rev Esp Salud Pública* 2008;82:43-55.
9. Rubenstein LZ. Falls in older people: epidemiology, risk factors and strategies for prevention. *Age Ageing* 2006;35 Suppl 2:ii37-ii41.



- 1  
2  
3 10. Büchele G, Becker C, Cameron ID, *et al*. Predictors of serious consequences of falls  
4 in residential aged care: analysis of more than 70,000 falls from residents of Bavarian  
5 nursing homes. *J Am Med Dir Assoc* 2014;15:559-63.  
6  
7  
8  
9  
10 11. Silva RB, Eslick GD, Duque G. Exercise for falls and fracture prevention in long  
11 term care facilities: a systematic review and meta-analysis. *J Am Med Dir Assoc*  
12 2013;14(9):685-689.e2.  
13  
14  
15  
16  
17 12. National Institute for Health and Care Excellence. Falls: assessment and prevention  
18 of falls in older people | Guidance and guidelines | NICE [Internet]. 2013. Available at:  
19 <http://bit.ly/1PwhNcb>  
20  
21  
22  
23  
24 13. Healey F, Oliver D, Milne A, Connelly J B. The effect of bedrails on falls and  
25 injury: a systematic review of clinical studies. *Age Ageing* 2008;37:368-78.  
26  
27  
28  
29  
30 14. Comité de Bioética de España. Consideraciones éticas y jurídicas sobre el uso de  
31 contenciones mecánicas y farmacológicas en los ámbitos social y sanitario. [Internet].  
32 2016. Available at: <http://bit.ly/2yrzg5k>  
33  
34  
35  
36  
37 15. Hofmann H, Hahn S. Characteristics of nursing home residents and physical  
38 restraint: a systematic literature review. *J Clin Nurs* 2014;23:3012-24.  
39  
40  
41  
42  
43 16. Fariña-López E, Estévez-Guerra GJ, Gandoy-Crego M, *et al*. Perception of spanish  
44 nursing staff on the use of physical restraints. *J Nurs Scholarsh Off. Publ. Sigma Theta*  
45 *Tau Int. Honor Soc. Nurs. Sigma Theta Tau.* 2014;46:322-30.  
46  
47  
48  
49  
50  
51  
52  
53  
54  
55  
56  
57  
58  
59  
60

1  
2  
3 **TABLES**  
4  
5

6 Table 1: Characteristics and consequences of falls  
7

|                                       | N<br>(411) | %    |
|---------------------------------------|------------|------|
| Day                                   |            |      |
| Monday                                | 68         | 16.5 |
| Tuesday                               | 62         | 15.1 |
| Wednesday                             | 48         | 11.7 |
| Thursday                              | 54         | 13.1 |
| Friday                                | 64         | 15.6 |
| Saturday                              | 43         | 10.5 |
| Sunday                                | 72         | 17.5 |
| Shift                                 |            |      |
| Morning                               | 146        | 35.5 |
| Afternoon                             | 142        | 34.5 |
| Night                                 | 123        | 29.9 |
| Location*                             |            |      |
| Bed                                   | 112        | 27.3 |
| Chair/Armchair                        | 96         | 23.4 |
| Toilet/Bathroom                       | 88         | 21.4 |
| Out of the room                       | 113        | 27.5 |
| Level of consciousness                |            |      |
| Conscious and aware                   | 303        | 73.7 |
| Disoriented                           | 93         | 22.6 |
| Nervous                               | 13         | 3.2  |
| Unconscious                           | 2          | 0.5  |
| Circumstances**                       |            |      |
| Alone                                 | 242        | 58.9 |
| Walking                               | 106        | 25.8 |
| Going to the toilet                   | 43         | 10.5 |
| Preventive measures                   |            |      |
| None                                  | 203        | 49.4 |
| Bed rails                             | 186        | 45.3 |
| Physical restraint                    | 50         | 12.2 |
| Suspension of psychotropic medication | 27         | 6.6  |
| Consequences:                         |            |      |
| None                                  | 243        | 59.1 |
| Bruising                              | 87         | 21.2 |
| Internal haemorrhage                  | 1          | 0.2  |
| Nosebleed                             | 0          | 0    |
| Injury – no stitches needed           | 60         | 14.6 |
| Injury – stitches needed              | 23         | 5.6  |
| Dislocation/sprain                    | 3          | 0.7  |
| Fracture                              | 22         | 5.3  |

\* Losses = 2

\*\* Losses = 20

1  
2  
3  
4  
5  
6  
7  
8  
9  
10  
11  
12  
13  
14  
15  
16  
17  
18  
19  
20  
21  
22  
23  
24  
25  
26  
27  
28  
29  
30  
31  
32  
33  
34  
35  
36  
37  
38  
39  
40  
41  
42  
43  
44  
45  
46  
47  
48  
49  
50  
51  
52  
53  
54  
55  
56  
57  
58  
59  
60

FIGURES

Figure 1: Flow diagram for the study.

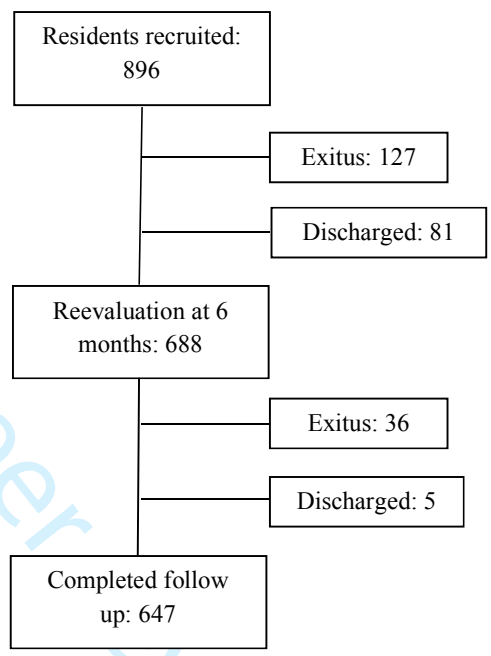

**STROBE 2007 (v4) Statement—Checklist of items that should be included in reports of *cohort studies***

| Section/Topic                | Item # | Recommendation                                                                                                                                                                       | Reported on page # |
|------------------------------|--------|--------------------------------------------------------------------------------------------------------------------------------------------------------------------------------------|--------------------|
| Title and abstract           | 1      | (a) Indicate the study's design with a commonly used term in the title or the abstract                                                                                               | 1                  |
|                              |        | (b) Provide in the abstract an informative and balanced summary of what was done and what was found                                                                                  | 2                  |
| <b>Introduction</b>          |        |                                                                                                                                                                                      |                    |
| Background/rationale         | 2      | Explain the scientific background and rationale for the investigation being reported                                                                                                 |                    |
| Objectives                   | 3      | State specific objectives, including any prespecified hypotheses                                                                                                                     | 4-5                |
| <b>Methods</b>               |        |                                                                                                                                                                                      |                    |
| Study design                 | 4      | Present key elements of study design early in the paper                                                                                                                              | 5                  |
| Setting                      | 5      | Describe the setting, locations, and relevant dates, including periods of recruitment, exposure, follow-up, and data collection                                                      | 5                  |
| Participants                 | 6      | (a) Give the eligibility criteria, and the sources and methods of selection of participants. Describe methods of follow-up                                                           | 5-6                |
|                              |        | (b) For matched studies, give matching criteria and number of exposed and unexposed                                                                                                  | --                 |
| Variables                    | 7      | Clearly define all outcomes, exposures, predictors, potential confounders, and effect modifiers. Give diagnostic criteria, if applicable                                             | 5-6                |
| Data sources/<br>measurement | 8*     | For each variable of interest, give sources of data and details of methods of assessment (measurement). Describe comparability of assessment methods if there is more than one group | 5-6                |
| Bias                         | 9      | Describe any efforts to address potential sources of bias                                                                                                                            | 6                  |
| Study size                   | 10     | Explain how the study size was arrived at                                                                                                                                            | 5                  |
| Quantitative variables       | 11     | Explain how quantitative variables were handled in the analyses. If applicable, describe which groupings were chosen and why                                                         | 6                  |
| Statistical methods          | 12     | (a) Describe all statistical methods, including those used to control for confounding                                                                                                | 6-7                |
|                              |        | (b) Describe any methods used to examine subgroups and interactions                                                                                                                  | 6                  |
|                              |        | (c) Explain how missing data were addressed                                                                                                                                          | 6-7                |
|                              |        | (d) If applicable, explain how loss to follow-up was addressed                                                                                                                       | 6-7                |
|                              |        | (e) Describe any sensitivity analyses                                                                                                                                                | 6-7                |
| <b>Results</b>               |        |                                                                                                                                                                                      |                    |

|                          |     |                                                                                                                                                                                                              |            |
|--------------------------|-----|--------------------------------------------------------------------------------------------------------------------------------------------------------------------------------------------------------------|------------|
| Participants             | 13* | (a) Report numbers of individuals at each stage of study—eg numbers potentially eligible, examined for eligibility, confirmed eligible, included in the study, completing follow-up, and analysed            | 7          |
|                          |     | (b) Give reasons for non-participation at each stage                                                                                                                                                         | 7          |
|                          |     | (c) Consider use of a flow diagram                                                                                                                                                                           | 17         |
| Descriptive data         | 14* | (a) Give characteristics of study participants (eg demographic, clinical, social) and information on exposures and potential confounders                                                                     | 7          |
|                          |     | (b) Indicate number of participants with missing data for each variable of interest                                                                                                                          | 16         |
|                          |     | (c) Summarise follow-up time (eg, average and total amount)                                                                                                                                                  | 7          |
| Outcome data             | 15* | Report numbers of outcome events or summary measures over time                                                                                                                                               | 7          |
| Main results             | 16  | (a) Give unadjusted estimates and, if applicable, confounder-adjusted estimates and their precision (eg, 95% confidence interval). Make clear which confounders were adjusted for and why they were included | 7,8,9      |
|                          |     | (b) Report category boundaries when continuous variables were categorized                                                                                                                                    | 7          |
|                          |     | (c) If relevant, consider translating estimates of relative risk into absolute risk for a meaningful time period                                                                                             | 9          |
| Other analyses           | 17  | Report other analyses done—eg analyses of subgroups and interactions, and sensitivity analyses                                                                                                               | 8          |
| <b>Discussion</b>        |     |                                                                                                                                                                                                              |            |
| Key results              | 18  | Summarise key results with reference to study objectives                                                                                                                                                     | 9,10,11,12 |
| <b>Limitations</b>       |     |                                                                                                                                                                                                              | 9,10,11,12 |
| Interpretation           | 20  | Give a cautious overall interpretation of results considering objectives, limitations, multiplicity of analyses, results from similar studies, and other relevant evidence                                   | 12         |
| Generalisability         | 21  | Discuss the generalisability (external validity) of the study results                                                                                                                                        | 12         |
| <b>Other information</b> |     |                                                                                                                                                                                                              |            |
| Funding                  | 22  | Give the source of funding and the role of the funders for the present study and, if applicable, for the original study on which the present article is based                                                | 13         |

\*Give information separately for cases and controls in case-control studies and, if applicable, for exposed and unexposed groups in cohort and cross-sectional studies.

**Note:** An Explanation and Elaboration article discusses each checklist item and gives methodological background and published examples of transparent reporting. The STROBE checklist is best used in conjunction with this article (freely available on the Web sites of PLoS Medicine at <http://www.plosmedicine.org/>, Annals of Internal Medicine at <http://www.annals.org/>, and Epidemiology at <http://www.epidem.com/>). Information on the STROBE Initiative is available at [www.strobe-statement.org](http://www.strobe-statement.org).

# BMJ Open

## CHARACTERISTICS, CONSEQUENCES AND PREVENTION OF FALLS IN INSTITUTIONALISED OLDER ADULTS IN THE PROVINCE OF MALAGA (SPAIN): A PROSPECTIVE COHORT MULTICENTRE STUDY.

|                                 |                                                                                                                                                                                                                                                                                                                                                                                                                                                                                                                                                                                                                                                                                                                                            |
|---------------------------------|--------------------------------------------------------------------------------------------------------------------------------------------------------------------------------------------------------------------------------------------------------------------------------------------------------------------------------------------------------------------------------------------------------------------------------------------------------------------------------------------------------------------------------------------------------------------------------------------------------------------------------------------------------------------------------------------------------------------------------------------|
| Journal:                        | <i>BMJ Open</i>                                                                                                                                                                                                                                                                                                                                                                                                                                                                                                                                                                                                                                                                                                                            |
| Manuscript ID                   | bmjopen-2017-020039.R1                                                                                                                                                                                                                                                                                                                                                                                                                                                                                                                                                                                                                                                                                                                     |
| Article Type:                   | Research                                                                                                                                                                                                                                                                                                                                                                                                                                                                                                                                                                                                                                                                                                                                   |
| Date Submitted by the Author:   | 14-Dec-2017                                                                                                                                                                                                                                                                                                                                                                                                                                                                                                                                                                                                                                                                                                                                |
| Complete List of Authors:       | Aranda-Gallardo, Marta; Agencia Sanitaria Costa del Sol, Department of Nursing<br>Miguel Morales-Asencio, Jose; Universidad de Málaga. Facultad de Ciencias de la Salud, Department of Nursing<br>Enriquez de Luna-Rodriguez, Margarita; Agencia Sanitaria Costa del Sol, Department of Nursing<br>Vazquez-Blanco, Maria Jose; Distrito Sanitario Málaga-Guadalhorce, Nursing Homes Unit<br>Morilla-Herrera, Juan Carlos; Distrito Sanitario Málaga-Guadalhorce, Nursing Homes Unit<br>Rivas-Ruiz, Francisco; Agencia Sanitaria Costa del Sol, Research Unit<br>Toribio-Montero, Juan Carlos; Agencia Sanitaria Costa del Sol, Department of Nursing<br>Canca-Sanchez, Jose Carlos; Agencia Sanitaria Costa del Sol, Department of Nursing |
| <b>Primary Subject Heading</b>: | Nursing                                                                                                                                                                                                                                                                                                                                                                                                                                                                                                                                                                                                                                                                                                                                    |
| Secondary Subject Heading:      | Health services research, Geriatric medicine                                                                                                                                                                                                                                                                                                                                                                                                                                                                                                                                                                                                                                                                                               |
| Keywords:                       | accidental fall, physical restraint, accident prevention, nursing homes                                                                                                                                                                                                                                                                                                                                                                                                                                                                                                                                                                                                                                                                    |
|                                 |                                                                                                                                                                                                                                                                                                                                                                                                                                                                                                                                                                                                                                                                                                                                            |

SCHOLARONE™  
Manuscripts

1  
2  
3 **CHARACTERISTICS, CONSEQUENCES AND PREVENTION OF FALLS IN**  
4 **INSTITUTIONALISED OLDER ADULTS IN THE PROVINCE OF MALAGA**  
5 **(SPAIN): A PROSPECTIVE COHORT MULTICENTRE STUDY.**  
6  
7  
8

9  
10 **Authors:**

11  
12 Marta Aranda-Gallardo<sup>1</sup>, Jose M Morales-Asencio<sup>2</sup>, Margarita Enriquez de Luna-  
13 Rodriguez<sup>1</sup>, Maria J Vazquez-Blanco<sup>3</sup>, Juan C Morilla-Herrera<sup>3</sup>, Francisco Rivas-Ruiz<sup>4</sup>,  
14  
15 Juan C Toribio Montero<sup>1</sup>, Jose C Canca-Sanchez<sup>1</sup>.  
16  
17

18  
19 <sup>1</sup>Department of Nursing. Agencia Sanitaria Costa del Sol, Marbella, Malaga, Spain.  
20

21  
22 <sup>2</sup>Faculty of Health Sciences, University of Malaga, Malaga, Spain.  
23

24  
25 <sup>3</sup>Nursing Homes Unit. Distrito Sanitario Malaga-Guadalhorce, Malaga, Spain.  
26

27  
28 <sup>4</sup>Research Unit. Agencia Sanitaria Costa del Sol, Marbella, Malaga, Spain.  
29  
30

31  
32 **Address correspondence to:** M. Aranda-Gallardo. Department of Nursing, Agencia  
33 Sanitaria Costa del Sol, Autovia A7 km. 187, 29603 Marbella, Malaga, Spain. Tel:  
34  
35 (+34) 951 976 612. Fax: 952 863 460. E-mail: [maranda@hcs.es](mailto:maranda@hcs.es)  
36  
37

38  
39  
40  
41  
42 **Key words:** Accidental fall, accident prevention, nursing homes, physical restraint.  
43

44  
45 **Word Count:** 3072.  
46  
47  
48  
49  
50  
51  
52  
53  
54  
55  
56  
57  
58  
59  
60

## Abstract

**Objectives:** Falls are an important adverse event among institutionalised persons. It is in this clinical setting where falls occur more frequently than in any other, despite the measures commonly taken to prevent them. This study aimed to determine the characteristics of a typical institutionalised elderly patient who suffers a fall, and to describe the physical harms resulting from this event. We then examined the association between falls and the preventive measures used.

**Methods:** This was a prospective cohort study in 37 nursing homes in Spain. The participants were all the nursing home residents institutionalised in these centres from May 2014 to July 2016. Participants were followed up for nine months. During this period, two observations were made to evaluate the preventive measures taken and to record the occurrence of falls.

**Results:** 896 residents were recruited, of whom 647 completed the study. During this period, 411 falls took place, affecting 213 residents. The injuries caused by the falls were mostly minor or moderate. They took place more frequently among women, and provoked 22 fractures (5.35%). The most commonly-used fall prevention measure were bed rails (53.53% of cases), followed by physical restraint (16.79%). The latter measure was associated with a higher incidence of injuries not requiring stitches (OR=2.06, 95% CI 1.01-4.22, p=0.054) and of injuries that did require stitches (OR=3.51, 95% CI 1.36-9.01, p=0.014) as a consequence of falls. Bed rails protected against night-time falls.

**Conclusions:** Falls are a very common adverse event in nursing homes. The prevention of falls is most commonly addressed by methods to restrain movement. The use of physical restraints is associated with a greater occurrence of injuries caused by a fall.



**Strengths and limitations of this study**

- This study describes the type of people who falls in a large cohort in nursing home residents and the consequences of falls.
- The most commonly used fall prevention measures are presented and their relationship with incidence and fall injury is analyzed.
- The results of this study allow us to reflect on and question the suitability of fall prevention measures used in clinical practice in nursing homes.
- The results are focused on the immediate physical harms resulting from falls. Wider consequences were not explored.

## BACKGROUND

Worldwide, falls are the second cause of death from accidental or unintentional injuries, after road traffic injuries. Each year, falls provoke 424,000 deaths throughout the world, with the highest incidence in low- and middle-income countries<sup>1</sup>. According to the World Health Organization (WHO), older people living in care institutions are more liable to fall than those living in the community: every year 30-50% of persons who are long-term resident in institutions suffer a fall, and 40% of them have more than one fall<sup>2</sup>. 20-30% of elderly persons who fall suffer moderate to severe injuries, such as hip fractures or traumatic brain injury. These lesions reduce mobility and independence, and increase the risk of premature death. In nursing homes and among women aged over 75 years, injury rates may be more than double the above figures<sup>3</sup>. In addition to the physical and emotional costs provoked by falls, the economic consequences are significant, with direct costs estimated at about €19.2 billion dollars per year<sup>4</sup>.

The aetiology of falls has been the subject of various epidemiological studies. A systematic review found that for residents of nursing homes, the following factors were directly related: a history of falls (OR=3.06), using a walking aid (OR=2.08) and moderate disability (OR=2.08)<sup>5</sup>. Efforts to minimise falls in nursing homes, where advanced age and physical, mental and sensorial limitations are commonly present, often consist of multifactor interventions. To design effective preventive measures, it is necessary to determine the circumstances associated with falls, and the injuries they can provoke, to categorize which circumstances involve the most severe negative outcomes.

### Purpose

The aim of this study was to determine the characteristics (age, sex, level of consciousness) of institutionalised elderly persons who suffer falls, their circumstances (date, place, performed activity and presence or not of other people during the fall) and

1  
2  
3 the physical harms resulting from this event. We also aimed to know what methods  
4  
5 were adopted to prevent falls and then to analyse the association between falls and the  
6  
7 preventive measures employed.  
8  
9

## 10 11 12 **METHODS**

13  
14  
15 **Study Design:** Prospective cohort study.  
16

17  
18 **Participants:** The study was carried out in institutions within the Nursing Homes Unit  
19  
20 of the Malaga-Guadalhorce Health District, in Andalusia, southern Spain. This Unit  
21  
22 cares for 2,541 persons resident in 68 nursing homes. The study participants were  
23  
24 mostly elderly and institutionalised in these centres. The inclusion criteria applied were  
25  
26 that they should be older than 16 years and resident in one of the above nursing homes  
27  
28 throughout the study period, or have entered during the study period. Those who refused  
29  
30 to participate were excluded.  
31

32  
33 **Sample:** The necessary sample size was calculated according to the prevalence of falls  
34  
35 reported in previous studies conducted in nursing homes. To detect a fall prevalence of  
36  
37 52%<sup>6</sup>, with an alpha value of 0.05 in a population of 2,541 institutionalised subjects and  
38  
39 a precision of 4%, it was determined that 485 subjects should be recruited. This value  
40  
41 was increased by 50% in anticipation of high mortality rates among the elderly  
42  
43 population, and so the minimum sample required for the initial evaluation was 728  
44  
45 residents.  
46  
47

48  
49 **Data collection:** The study was conducted from May 2014 to July 2016. The  
50  
51 participants were recruited consecutively at each collaborating centre, and all of the  
52  
53 residents at these 37 centres agreed to take part.  
54  
55  
56  
57  
58  
59  
60

1  
2  
3 The data evaluated included the patients' age and sex, the fall prevention measures  
4 employed (bed rails, physical restraints, the rearrangement of furniture and the  
5 suspension of psychotropic medication), the number of falls suffered, the level of  
6 consciousness when the fall occurred, the date and time of day, the circumstances  
7 (alone, walking, going to toilet) and the immediate harms resulting from each fall.  
8  
9

10  
11  
12  
13  
14 Bed rails were considered as side bars that prevent, limit or restrict the movements of a  
15 person, such as getting out of bed. Physical restraint was any device (wrist strap,  
16 abdominal belt or ankle brace) that attached or tied to the resident's body limits the free  
17 movement of all or a part of the body.  
18  
19

20  
21  
22  
23 In an initial assessment, the characterisation variables were collected and the fall  
24 prevention measures investigated. The same patients were reassessed six months later,  
25 after which they were followed for three more months to detect the occurrence of any  
26 additional falls in this period.  
27  
28  
29

30  
31  
32 Falls were evaluated in three ways: by analysing the records maintained by each nursing  
33 home, verifying them with the caregiver staff and also with the patients themselves if  
34 their cognitive state allowed it. The definition adopted for a fall was that proposed by  
35 the WHO: "an event which results in a person coming to rest inadvertently on the  
36 ground or floor or other lower level"<sup>1</sup>. In all cases of falls the nurses who collaborated  
37 with the project filled in a record form, stating the circumstances and consequences of  
38 each fall.  
39  
40  
41  
42  
43  
44  
45  
46

47  
48 **Statistical analysis:** Descriptive statistics of the variables were obtained by an  
49 exploratory analysis, which obtained measures of central tendency and dispersion or  
50 percentages, according to the nature of the variables. The normality of the distribution  
51 was evaluated in each case by the Kolmogorov-Smirnov test. Asymmetry and/or  
52 kurtosis were also considered, and histograms of the distributions were obtained.  
53  
54  
55  
56  
57  
58  
59

1  
2  
3 Bivariate analysis was performed using Student's t and chi-square tests, according to the  
4 characteristics of the variables, when they were normally distributed. Otherwise,  
5 nonparametric methods, such as the Wilcoxon, Kruskal-Wallis or Mann-Whitney U  
6 tests were used. The descriptors obtained were the joint and marginal distributions, with  
7 the mean, standard deviation (SD), measures of effect and 95% confidence intervals  
8 (CI). Correlational analyses between quantitative variables were performed using  
9 Pearson's or Spearman's r, depending on the nature of the parameter.  
10  
11  
12  
13  
14  
15  
16

17  
18 The statistical program used was SPSS v.22.  
19  
20

21 **Ethical considerations:** The clinical data were segregated from the identification data,  
22 and the databases were encrypted and stored in computers destined exclusively to this  
23 project. The data were collected online (Lime Survey), encrypted, and hosted on a  
24 server with maximum security measures and password-coded access. Ethical approval  
25 for this study was obtained from the Costa del Sol Research Ethics Committee  
26 (reference CS-0519).  
27  
28  
29  
30  
31  
32  
33  
34  
35  
36

## 37 **RESULTS**

38  
39 The study sample consisted of 896 nursing home residents. All received an initial  
40 assessment, and 688 (76.78%) were followed up and re-evaluated at six months.  
41  
42 Finally, 647 patients completed the study after nine months of follow-up (Fig. 1). Of the  
43 initial patients, 636 (71%) were women and 260 (29%) were men. The mean age was  
44 81.81 years (SD 9.73) in a range between 36 and 102 years. The mean age of the  
45 women (83.89 years, SD 8.93) was significantly higher than that of the men (77.95  
46 years, SD 10.51) ( $p < 0.001$ ).  
47  
48  
49  
50  
51  
52  
53  
54  
55  
56  
57  
58  
59  
60

1  
2  
3 During the study period, 213 residents (23.77%, 95% CI: 20.93-26.15) suffered a fall,  
4 and 88 had multiple falls. In total, there were 411 falls. The cumulative incidence of  
5 falls was 45.87%. Of those who fell, 155 (72.77%) were women, although there were no  
6 significant differences by sex between fallers and non-fallers ( $p=0.546$ ) or between  
7 fallers and multiple-fallers ( $p=0.518$ ). The mean age of the fallers (83.45 years; SD  
8 8.06) was significantly higher than that of the non-fallers (81.31 years; SD 10.14)  
9 ( $p=0.015$ ). However, there were no significant differences by sex between those who  
10 suffered multiple falls (mean age 83.46 years, SD 8.34) and those who did not (mean  
11 age 83.51 years, SD 7.72) ( $p=0.907$ ). The circumstances and immediate harms resulting  
12 from falls are shown in Table 1. By days of the week, the largest number of falls took  
13 place on a Sunday (17.52%), and they were evenly distributed among the morning,  
14 afternoon and evening shifts. The patients who suffered falls were mainly conscious and  
15 well-oriented ( $n=303$ , 73.72%). In 242 cases (58.88%), the patient was alone at the time  
16 of the fall, and on most occasions ( $n=305$ , 74.21%) the fall did not take place while the  
17 patient was walking. In 43 cases (10.46%), the fall occurred when the resident was  
18 going towards the toilet.

19  
20  
21  
22  
23  
24  
25  
26  
27  
28  
29  
30  
31  
32  
33  
34  
35  
36  
37  
38 As shown in Table 1, in 168 cases (40.88%) the fall provoked a physical harm to the  
39 resident, the most frequent being haematomas ( $n=87$ ) and injuries not requiring stitches  
40 ( $n=60$ ). There were 22 fractures (5.35%). The bivariate analysis revealed significant  
41 differences by sex concerning the day of the fall, with Sundays being more frequent  
42 among women (20.2%) and Mondays among men (22.8% of the falls affecting men  
43 occurred on this day of the week) ( $p=0.045$ ). Women were more likely to fall in the  
44 morning (40.4%), and men at night (41.2%) ( $p=0.001$ ). Men tended to fall from bed  
45 (40.4%) and women from a chair (27.1%) ( $p=0.001$ ). There were significantly more  
46 falls among men when they were alone (73.7%,  $p<0.001$ ) and among women while they  
47  
48  
49  
50  
51  
52  
53  
54  
55  
56  
57  
58  
59  
60

1  
2  
3 were walking (30%,  $p=0.002$ ). Regarding the consequences, women were significantly  
4 more affected by falls than were men (44.4% vs. 31.58% respectively,  $p=0.019$ ). By the  
5 type of consequence, fractures affected women more than men ( $n=20$  vs.  $n=2$ ) but the  
6 difference was at the limit of statistical significance ( $p=0.05$ ).  
7  
8  
9

10  
11 Concerning the preventive measures used, of the 1,584 assessments made, bed rails  
12 were employed in 53.53% of cases; in 16.79% there were physical restraints and in  
13 3.03%, the suspension of psychotropic medication. In no case was the clinical furniture  
14 rearranged. When falls took place, in 45.25% of the cases bed rails were fitted, in  
15 12.16% there were physical restraints and in 6.57% the psychotropic medication had  
16 been suspended (Table 1). The proportion of injuries due to falls (grouped in mild,  
17 moderate or serious injuries) according to the preventive measures adopted is shown in  
18 figure 2. An analysis was performed to determine whether any of the prevention  
19 measures adopted were related to injuries due to falls. In this respect, no significant  
20 relationship was observed between fall-related injuries and the use of bed rails or the  
21 suspension of psychotropic medication. However, the use of physical restraints was  
22 found to be significantly associated with such consequences, in 28 of the 50 falls with  
23 restraints ( $p=0.022$ ). Specifically, the use of restraints was associated with a higher  
24 incidence of injuries not requiring stitches in 12 cases (OR=2.06, 95% CI 1.01-4.22),  
25 although the difference was at the limit of statistical significance ( $p=0.054$ ). In seven  
26 cases, stitches were needed for injuries suffered when restraints were fitted (OR=3.51,  
27 95% CI 1.36-9.01,  $p=0.014$ ). None of the preventive measures examined were related to  
28 the occurrence of fractures following a fall. On the other hand, there was found to be a  
29 relation between the use of preventive measures and the following variables: the time of  
30 day, the place and the circumstances of the fall. When bed rails were used during the  
31  
32  
33  
34  
35  
36  
37  
38  
39  
40  
41  
42  
43  
44  
45  
46  
47  
48  
49  
50  
51  
52  
53  
54  
55  
56  
57  
58  
59  
60

1  
2  
3 night, they had a protective effect, which is quite significant, as 37 of the 123 falls  
4 occurred during the night ( $p<0.001$ ).  
5  
6  
7  
8  
9

## 10 **DISCUSSION**

11  
12 Among the strengths of this study are the large sample size ( $n=896$ ), the extended  
13 follow-up period (nine months) and its multi-centre format, with the participation of 37  
14 nursing homes for the elderly. The sample consisted mainly of women (71%), who on  
15 average were almost six years older than the male participants, which is in line with the  
16 greater longevity of the female sex. The majority of those who suffered falls were  
17 women too, but there were no differences by sex in the occurrence of one or more falls,  
18 a finding that corroborates previous research in this respect in nursing homes<sup>7</sup>. The  
19 study subjects were elderly, with an average age of about 82 years. The results obtained  
20 confirm that advanced age is a risk factor for falls, with fallers being on average two  
21 years older than non-fallers.  
22  
23  
24  
25  
26  
27  
28  
29  
30  
31  
32  
33

34  
35 The cumulative incidence of falls (45.87%) is within the range published in the  
36 literature in this context. In this respect, other authors have reported rates of 34-46% in  
37 our country<sup>8</sup>, and even 52% in other country<sup>6</sup>. In our study, over half of the falls that  
38 took place (59.12%) had no consequences on the patient, and when there were  
39 consequences, they usually took the form of minor injuries. Taking into account the  
40 minor injuries produced, whether or not stitches were required, and the falls resulting in  
41 fractures, our results showed a slightly lower incidence of fractures with regards to  
42 those previously reported. Rubenstein (2006) concluded that in nursing homes 10-25%  
43 of falls result in fractures or injuries<sup>9</sup>. Another study observed that “*serious falls were*  
44 *associated with increasing age, being female, and less restricted functional status*”<sup>10</sup>.  
45  
46  
47  
48  
49  
50  
51  
52  
53  
54  
55  
56  
57  
58  
59  
60 Our results show that women suffer more consequences from falls than men;



1  
2  
3 nevertheless, there were no differences by sex as concerns injuries requiring stitches or  
4  
5 not, or when the fall provoked a fracture. Although such consequences were more  
6  
7 evident among women, the difference was at the limit of statistical significance.  
8

9  
10 Although several research studies have shown that exercise programs are effective to  
11  
12 prevent falls in long term care facilities<sup>11</sup>, the fall prevention strategies observed in our  
13  
14 study are aimed at limiting mobility. The most commonly used fall prevention measure  
15  
16 was that of bed rails, followed by physical restraints. In fall events, the presence of  
17  
18 restraints was associated with a greater frequency of injuries, in particular those not  
19  
20 requiring stitches (the difference was at the limit of significance) and those where  
21  
22 stitches were required. Another preventive measure used was the suspension of  
23  
24 psychotropic medication. Clinical practice guidelines recommend, that older people on  
25  
26 psychotropic medications should have their medication reviewed, with specialist input if  
27  
28 appropriate, and discontinued if possible to reduce their risk of falling<sup>12</sup>. Nevertheless,  
29  
30 this measure was adopted in only 3.03% of the assessments made. The use of methods  
31  
32 of physical and pharmacological containment is a controversial topic, since it implies a  
33  
34 restriction of mobility, which is detrimental to the patient's functional capacity. A  
35  
36 systematic review found no evidence that bed rails increased the risk of falls or of  
37  
38 injuries from falls<sup>13</sup>, in contrast to our own findings. Moreover, when bed rails were  
39  
40 used during the night shift, fewer falls occurred. According to the Spanish Bioethics  
41  
42 Committee<sup>14</sup>, the use of restraints in nursing homes for the elderly is more common in  
43  
44 Spain than elsewhere, reaching almost 40%, compared to 15% in countries such as  
45  
46 France, Italy, Norway and the USA. The Spanish Bioethics Committee recommends  
47  
48 that the use of mobility restrictions should be protocolised, supervised and subject to  
49  
50 ongoing evaluation, and in all cases, should be performed with the consent of the  
51  
52 patients or their guardians. The results obtained in the present study corroborate these  
53  
54  
55  
56  
57  
58  
59  
60

1  
2  
3 recommendations, although the existence or otherwise of consent for the physical  
4 restraints used was not verified. That could be the subject of future studies. Cognitive  
5 impairment, severe mobility problems and a greatly restricted capacity to perform the  
6 activities of daily living are determinant factors in the decision to implement systems of  
7 restraint. With regard to fall prevention, the combination of these factors requires  
8 special nursing care. Paradoxically, the use of these containment systems has been  
9 associated with a higher incidence of falls<sup>15</sup>, although in fact their use for nursing home  
10 residents is considered necessary by the staff who attends them. The prime reason for  
11 their use is, precisely, to prevent falls, as reported in a survey of nursing staff in Spain<sup>16</sup>.  
12 The proper use of fall prevention measures could usefully be considered in a later study,  
13 together with consideration of the moral dilemma that would be posed to nursing staff if  
14 no measures of containment were applied to patients at risk. This moral dilemma should  
15 be taken into account in the realization of future protocols, reinforcing the training of  
16 staff in this regard. It would be advisable to increase the periodicity of assessments to  
17 detect possible risk factors for recurrence and thus avoid possible falls.  
18  
19  
20  
21  
22  
23  
24  
25  
26  
27  
28  
29  
30  
31  
32  
33  
34

35 This study has some limitations. In particular, the number of fall events may have been  
36 understated. To address this possibility, an event record table was created, distributed to  
37 all the nursing homes participating and collected weekly. On the collection day, the  
38 researchers directly considered the veracity of the data reported, at the corresponding  
39 health centres. In addition, due to the nature of the study conducted, there could be  
40 contamination related to the implementation of fall prevention interventions in the  
41 nursing homes, and a possible Hawthorne effect. Results are focused on immediate  
42 physical harm but the wider consequences such as increasing dependency, fear of  
43 further falls, reduction in activity levels, hospital admissions, low mood or death have  
44 not been explored.  
45  
46  
47  
48  
49  
50  
51  
52  
53  
54  
55  
56  
57  
58  
59  
60

1  
2  
3 In conclusion, this study shows that falls are a common adverse event in nursing homes.  
4 They are related to advanced age, and provoke injuries that are mainly slight to  
5 moderate. The method most commonly used to prevent falls is that of movement  
6 restriction. The use of physical restraints is associated with a greater occurrence of  
7 injuries due to falls.  
8  
9  
10  
11  
12  
13  
14  
15

### 16 **Author's contribution**

17  
18 JMMA and MAG designed the study. MAG, MELR, MJVB, JCCS, JCMH, FRR and  
19 JCTM were involved in data collection and evaluation. JMMA performed the statistical  
20 analysis. All authors helped with the interpretation of the data. MAG, MELR, MJVB  
21 and JMMA drafted the first version of the manuscript, and all authors contributed to  
22 subsequent versions and revised it critically for important intellectual content. All  
23 authors read and approved the final manuscript.  
24  
25  
26  
27  
28  
29  
30  
31  
32  
33  
34

### 35 **Funding**

36  
37 This work was supported by the Regional Health Ministry of Andalusia [PI-0152/2013];  
38 approval notification received December 2013.  
39  
40  
41  
42  
43  
44

### 45 **Competing interest**

46  
47 The authors have no conflicts of interest to disclose.  
48  
49  
50  
51  
52

### 53 **Ethics approval**

54  
55 The Costa del Sol Research Ethics Committee granted its consent (reference CS-0519).  
56  
57  
58  
59  
60

1  
2  
3 **Data sharing statement**  
4

5 Data are available on request from the authors.  
6  
7  
8  
9

10 **Acknowledgements**  
11

12  
13 We thank the managers and collaborators of all nursing homes participating in the  
14  
15 project.  
16  
17  
18  
19  
20  
21  
22  
23  
24  
25  
26  
27  
28  
29  
30  
31  
32  
33  
34  
35  
36  
37  
38  
39  
40  
41  
42  
43  
44  
45  
46  
47  
48  
49  
50  
51  
52  
53  
54  
55  
56  
57  
58  
59  
60

**REFERENCES**

1. World Health Organization. Falls. Fact sheet No. 344 [Internet]. 2016. Available at: <http://bit.ly/1i7Ixzq>
2. World Health Organization. WHO Global Report on Falls Prevention in Older Age [Internet]. 2007. Available at: <http://bit.ly/1IltXUR>
3. Gama ZA da S, Conesa AAG. Morbilidad, factores de riesgo y consecuencias de las caídas en ancianos. *Fisioterapia* 2008;30:142-51.
4. Stevens JA, Corso PS, Finkelstein EA, Miller TR. The costs of fatal and non-fatal falls among older adults. *Inj Prev* 2006;12:290-5.
5. Deandrea S, Bravi F, Turati F, *et al*. Risk factors for falls in older people in nursing homes and hospitals. A systematic review and meta-analysis. *Arch Gerontol Geriatr* 2013;56:407-15.
6. Meyer G, Köpke S, Haastert B, Mühlhauser I. Comparison of a fall risk assessment tool with nurses' judgement alone: a cluster-randomised controlled trial. *Age Ageing* 2009;38:417-23.
7. Sharifi F, Fakhrzadeh H, Memari A, *et al*. Predicting risk of the fall among aged adult residents of a nursing home. *Arch Gerontol Geriatr* 2015;61:124-30.
8. Silva Gama ZA da, Gómez Conesa A, Sobral Ferreira M. Epidemiología de caídas de ancianos en España: Una revisión sistemática, 2007. *Rev Esp Salud Pública* 2008;82:43-55.
9. Rubenstein LZ. Falls in older people: epidemiology, risk factors and strategies for prevention. *Age Ageing* 2006;35 Suppl 2:ii37-ii41.

- 1  
2  
3 10. Büchele G, Becker C, Cameron ID, *et al*. Predictors of serious consequences of falls  
4 in residential aged care: analysis of more than 70,000 falls from residents of Bavarian  
5 nursing homes. *J Am Med Dir Assoc* 2014;15:559-63.  
6  
7  
8  
9  
10 11. Silva RB, Eslick GD, Duque G. Exercise for falls and fracture prevention in long  
11 term care facilities: a systematic review and meta-analysis. *J Am Med Dir Assoc*  
12 2013;14(9):685-689.e2.  
13  
14  
15  
16  
17 12. National Institute for Health and Care Excellence. Falls: assessment and prevention  
18 of falls in older people | Guidance and guidelines | NICE [Internet]. 2013. Available at:  
19 <http://bit.ly/1PwhNcb>  
20  
21  
22  
23  
24 13. Healey F, Oliver D, Milne A, Connelly J B. The effect of bedrails on falls and  
25 injury: a systematic review of clinical studies. *Age Ageing* 2008;37:368-78.  
26  
27  
28  
29  
30 14. Comité de Bioética de España. Consideraciones éticas y jurídicas sobre el uso de  
31 contenciones mecánicas y farmacológicas en los ámbitos social y sanitario. [Internet].  
32 2016. Available at: <http://bit.ly/2yrzg5k>  
33  
34  
35  
36  
37 15. Hofmann H, Hahn S. Characteristics of nursing home residents and physical  
38 restraint: a systematic literature review. *J Clin Nurs* 2014;23:3012-24.  
39  
40  
41  
42  
43 16. Fariña-López E, Estévez-Guerra GJ, Gandoy-Crego M, *et al*. Perception of spanish  
44 nursing staff on the use of physical restraints. *J Nurs Scholarsh Off. Publ. Sigma Theta*  
45 *Tau Int. Honor Soc. Nurs. Sigma Theta Tau.* 2014;46:322-30.  
46  
47  
48  
49  
50  
51  
52  
53  
54  
55  
56  
57  
58  
59  
60

1  
2  
3 **TABLES**  
4  
5

6 Table 1: Characteristics and consequences of falls  
7

|                                       | N<br>(411) | %    |
|---------------------------------------|------------|------|
| Day                                   |            |      |
| Monday                                | 68         | 16.5 |
| Tuesday                               | 62         | 15.1 |
| Wednesday                             | 48         | 11.7 |
| Thursday                              | 54         | 13.1 |
| Friday                                | 64         | 15.6 |
| Saturday                              | 43         | 10.5 |
| Sunday                                | 72         | 17.5 |
| Shift                                 |            |      |
| Morning                               | 146        | 35.5 |
| Afternoon                             | 142        | 34.5 |
| Night                                 | 123        | 29.9 |
| Location*                             |            |      |
| Bed                                   | 112        | 27.3 |
| Chair/Armchair                        | 96         | 23.4 |
| Toilet/Bathroom                       | 88         | 21.4 |
| Out of the room                       | 113        | 27.5 |
| Level of consciousness                |            |      |
| Conscious and aware                   | 303        | 73.7 |
| Disoriented                           | 93         | 22.6 |
| Nervous                               | 13         | 3.2  |
| Unconscious                           | 2          | 0.5  |
| Circumstances**                       |            |      |
| Alone                                 | 242        | 58.9 |
| Walking                               | 106        | 25.8 |
| Going to the toilet                   | 43         | 10.5 |
| Preventive measures                   |            |      |
| None                                  | 203        | 49.4 |
| Bed rails                             | 186        | 45.3 |
| Physical restraint                    | 50         | 12.2 |
| Suspension of psychotropic medication | 27         | 6.6  |
| Consequences:                         |            |      |
| None                                  | 243        | 59.1 |
| Haematoma                             | 87         | 21.2 |
| Internal haemorrhage                  | 1          | 0.2  |
| Nosebleed                             | 0          | 0    |
| Injury – no stitches needed           | 60         | 14.6 |
| Injury – stitches needed              | 23         | 5.6  |
| Dislocation/sprain                    | 3          | 0.7  |
| Fracture                              | 22         | 5.3  |

\* Losses = 2

\*\* Losses = 20

1  
2  
3 FIGURES  
4

5  
6 Figure 1: Flow diagram for the study.  
7  
8  
9

10  
11 Figure 2: Preventive measures and proportion of fall-related injuries.  
12  
13

14 \*S.P.M.: Suspension of psychotropic medication.  
15

16 Fall-related injuries groups: absence (without injuries); minor (haematoma and injuries not requiring  
17 stitches); moderate (injuries requiring stitches and dislocation/sprain); serious (internal haemorrhage and  
18 fracture).  
19  
20  
21  
22  
23  
24  
25  
26  
27  
28  
29  
30  
31  
32  
33  
34  
35  
36  
37  
38  
39  
40  
41  
42  
43  
44  
45  
46  
47  
48  
49  
50  
51  
52  
53  
54  
55  
56  
57  
58  
59  
60



1  
2  
3  
4  
5  
6  
7  
8  
9  
10  
11  
12  
13  
14  
15  
16  
17  
18  
19  
20  
21  
22  
23  
24  
25  
26  
27  
28  
29  
30  
31  
32  
33  
34  
35  
36  
37  
38  
39  
40  
41  
42  
43  
44  
45  
46  
47  
48  
49  
50  
51  
52  
53  
54  
55  
56  
57  
58  
59  
60

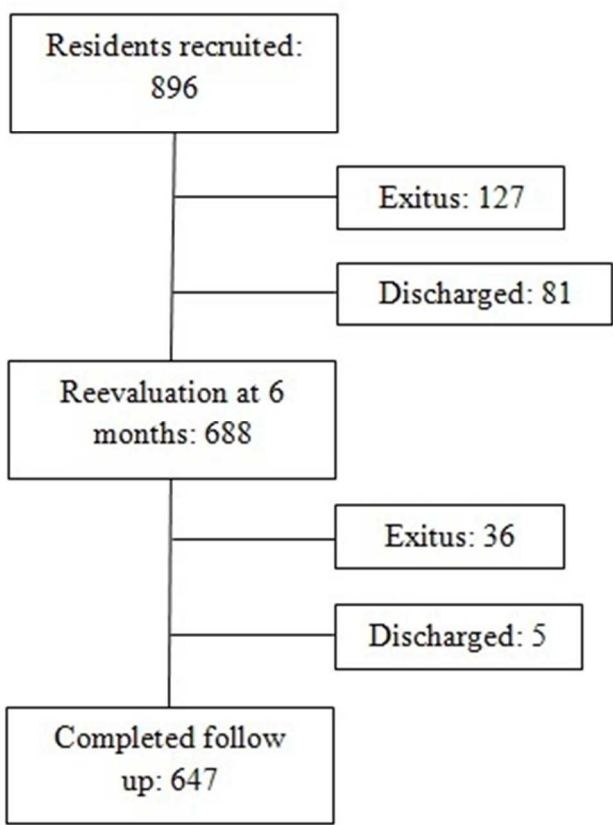

Figure 1

29x36mm (300 x 300 DPI)

only

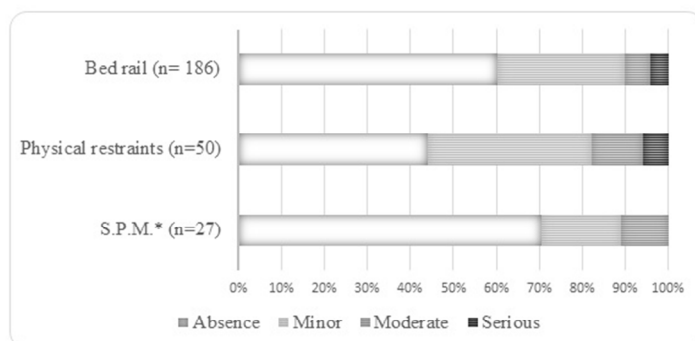

Figure 2

69x38mm (300 x 300 DPI)

**STROBE 2007 (v4) Statement—Checklist of items that should be included in reports of *cohort studies***

| Section/Topic                | Item # | Recommendation                                                                                                                                                                       | Reported on page # |
|------------------------------|--------|--------------------------------------------------------------------------------------------------------------------------------------------------------------------------------------|--------------------|
| Title and abstract           | 1      | (a) Indicate the study's design with a commonly used term in the title or the abstract                                                                                               | 1                  |
|                              |        | (b) Provide in the abstract an informative and balanced summary of what was done and what was found                                                                                  | 2                  |
| <b>Introduction</b>          |        |                                                                                                                                                                                      |                    |
| Background/rationale         | 2      | Explain the scientific background and rationale for the investigation being reported                                                                                                 |                    |
| Objectives                   | 3      | State specific objectives, including any prespecified hypotheses                                                                                                                     | 4-5                |
| <b>Methods</b>               |        |                                                                                                                                                                                      |                    |
| Study design                 | 4      | Present key elements of study design early in the paper                                                                                                                              | 5                  |
| Setting                      | 5      | Describe the setting, locations, and relevant dates, including periods of recruitment, exposure, follow-up, and data collection                                                      | 5                  |
| Participants                 | 6      | (a) Give the eligibility criteria, and the sources and methods of selection of participants. Describe methods of follow-up                                                           | 5-6                |
|                              |        | (b) For matched studies, give matching criteria and number of exposed and unexposed                                                                                                  | --                 |
| Variables                    | 7      | Clearly define all outcomes, exposures, predictors, potential confounders, and effect modifiers. Give diagnostic criteria, if applicable                                             | 5-6                |
| Data sources/<br>measurement | 8*     | For each variable of interest, give sources of data and details of methods of assessment (measurement). Describe comparability of assessment methods if there is more than one group | 5-6                |
| Bias                         | 9      | Describe any efforts to address potential sources of bias                                                                                                                            | 6                  |
| Study size                   | 10     | Explain how the study size was arrived at                                                                                                                                            | 5                  |
| Quantitative variables       | 11     | Explain how quantitative variables were handled in the analyses. If applicable, describe which groupings were chosen and why                                                         | 6                  |
| Statistical methods          | 12     | (a) Describe all statistical methods, including those used to control for confounding                                                                                                | 6-7                |
|                              |        | (b) Describe any methods used to examine subgroups and interactions                                                                                                                  | 6                  |
|                              |        | (c) Explain how missing data were addressed                                                                                                                                          | 6-7                |
|                              |        | (d) If applicable, explain how loss to follow-up was addressed                                                                                                                       | 6-7                |
|                              |        | (e) Describe any sensitivity analyses                                                                                                                                                | 6-7                |
| <b>Results</b>               |        |                                                                                                                                                                                      |                    |

|                          |     |                                                                                                                                                                                                              |            |
|--------------------------|-----|--------------------------------------------------------------------------------------------------------------------------------------------------------------------------------------------------------------|------------|
| Participants             | 13* | (a) Report numbers of individuals at each stage of study—eg numbers potentially eligible, examined for eligibility, confirmed eligible, included in the study, completing follow-up, and analysed            | 7          |
|                          |     | (b) Give reasons for non-participation at each stage                                                                                                                                                         | 7          |
|                          |     | (c) Consider use of a flow diagram                                                                                                                                                                           | 17         |
| Descriptive data         | 14* | (a) Give characteristics of study participants (eg demographic, clinical, social) and information on exposures and potential confounders                                                                     | 7          |
|                          |     | (b) Indicate number of participants with missing data for each variable of interest                                                                                                                          | 16         |
|                          |     | (c) Summarise follow-up time (eg, average and total amount)                                                                                                                                                  | 7          |
| Outcome data             | 15* | Report numbers of outcome events or summary measures over time                                                                                                                                               | 7          |
| Main results             | 16  | (a) Give unadjusted estimates and, if applicable, confounder-adjusted estimates and their precision (eg, 95% confidence interval). Make clear which confounders were adjusted for and why they were included | 7,8,9      |
|                          |     | (b) Report category boundaries when continuous variables were categorized                                                                                                                                    | 7          |
|                          |     | (c) If relevant, consider translating estimates of relative risk into absolute risk for a meaningful time period                                                                                             | 9          |
| Other analyses           | 17  | Report other analyses done—eg analyses of subgroups and interactions, and sensitivity analyses                                                                                                               | 8          |
| <b>Discussion</b>        |     |                                                                                                                                                                                                              |            |
| Key results              | 18  | Summarise key results with reference to study objectives                                                                                                                                                     | 9,10,11,12 |
| <b>Limitations</b>       |     |                                                                                                                                                                                                              | 9,10,11,12 |
| Interpretation           | 20  | Give a cautious overall interpretation of results considering objectives, limitations, multiplicity of analyses, results from similar studies, and other relevant evidence                                   | 12         |
| Generalisability         | 21  | Discuss the generalisability (external validity) of the study results                                                                                                                                        | 12         |
| <b>Other information</b> |     |                                                                                                                                                                                                              |            |
| Funding                  | 22  | Give the source of funding and the role of the funders for the present study and, if applicable, for the original study on which the present article is based                                                | 13         |

\*Give information separately for cases and controls in case-control studies and, if applicable, for exposed and unexposed groups in cohort and cross-sectional studies.

**Note:** An Explanation and Elaboration article discusses each checklist item and gives methodological background and published examples of transparent reporting. The STROBE checklist is best used in conjunction with this article (freely available on the Web sites of PLoS Medicine at <http://www.plosmedicine.org/>, Annals of Internal Medicine at <http://www.annals.org/>, and Epidemiology at <http://www.epidem.com/>). Information on the STROBE Initiative is available at [www.strobe-statement.org](http://www.strobe-statement.org).
